# Supplementary material
Source: PubMed Central journal article supplement (PMC2769933)
Supplement: NIHMS152614-supplement-supplement_1.pdf [file NIHMS152614-supplement-supplement_1.pdf]

**Online only Table.** Baseline characteristics of incident diabetes cases from Caucasian origin stratified by inclusion into the current analysis.

| <i>Variable</i>                       | <i>Diabetes cases<br/>not included</i> | <i>Diabetes cases<br/>included</i> | <i>P</i> |
|---------------------------------------|----------------------------------------|------------------------------------|----------|
| <b>N</b>                              | 288                                    | 55                                 |          |
| <b>Age (yrs)</b>                      | 51.2 ± 6.3                             | 50.9 ± 6.4                         | 0.77     |
| <b>Male (%)</b>                       | 201 (69.8)                             | 38 (69.1)                          | 1.00     |
| <b>BMI (kg/m<sup>2</sup>)</b>         | 27.7 ± 4.9                             | 27.0 ± 4.3                         | 0.27     |
| <b>Waist (cm)</b>                     | 91 ± 14                                | 90 ± 13                            | 0.80     |
| <b>Total cholesterol (mmol/l)</b>     | 6.8 ± 1.1                              | 6.5 ± 1.1                          | 0.11     |
| <b>Triglycerides (mmol/l)</b>         | 1.8 [1.3]                              | 1.6 [0.8]                          | 0.32     |
| <b>Systolic blood pressure (mmHg)</b> | 125 ± 15                               | 126 ± 13                           | 0.82     |
| <b>C-reactive protein (mg/l)</b>      | 1.60 [2.62]                            | 1.29 [2.47]                        | 0.34     |
| <b>Fasting glucose (mmol/l)</b>       | 5.48 ± 0.55                            | 5.49 ± 0.54                        | 0.95     |
| <b>Physical activity</b>              |                                        |                                    | 0.95     |
| <b>non/mild</b>                       | 117 (40.5)                             | 21 (38.9)                          |          |
| <b>moderate</b>                       | 132 (45.8)                             | 26 (48.1)                          |          |
| <b>vigorous</b>                       | 39 (13.7)                              | 7 (13.0)                           |          |
| <b>Positive family history (%)</b>    | 62 (21.7)                              | 4 (7.4)                            | 0.014    |
| <b>Civil servant grade</b>            |                                        |                                    | 0.58     |
| <b>administrative</b>                 | 100 (34.6)                             | 21 (38.9)                          |          |
| <b>executive</b>                      | 149 (51.9)                             | 24 (44.4)                          |          |
| <b>clerical/support</b>               | 39 (13.4)                              | 9 (16.7)                           |          |

Data with normal and non-normal distribution are given as mean  $\pm$  standard deviation and median [interquartile range], respectively. Groups were compared using chi-square test, Fisher's exact test, two-sample t-test and Wilcoxon test as appropriate.
